# Supplementary material for: Yak Gut Microbiota: A Systematic Review and Meta-Analysis
Source: Front Vet Sci. 2022 Jun 28;9:889594. doi: 10.3389/fvets.2022.889594 (PMC9274166; doi:10.3389/fvets.2022.889594)
Supplement: Supplementary file 1 [file Table_1.XLSX]

## Sheet: yak microbiota R2
	Reference Information (First Author Name, Publication Year, Journal Name)	Batch	Intestinal segment	Season	Sample Location	Sample Location Altitude (m)	Province	Yak Husbandry	Feeding pattern	Sex	Physical condition	Age
	Anum Ali Ahmad et al.,2020 Front Microbiol	1	Rumen	Spring	Hongtu Yak Breeding Cooperatives of an Autonomous Prefecture	3230	Gansu Province	Low energy level	Feeding	Castrated	Healthy	Unknown
	Anum Ali Ahmad et al.,2020 Front Microbiol	1	Rumen	Spring	Hongtu Yak Breeding Cooperatives of an Autonomous Prefecture	3230	Gansu Province	Medium energy level	Feeding	Castrated	Healthy	Unknown
	Anum Ali Ahmad et al.,2020 Front Microbiol	1	Rumen	Spring	Hongtu Yak Breeding Cooperatives of an Autonomous Prefecture	3230	Gansu Province	High energy level	Feeding	Castrated	Healthy	Unknown
	Qingshan Fan et al.,2020 animals	2	Rumen	Spring	Maqu Grassland Agricultural Trial Station	3704	Gansu Province	Herbage Vegetative stage	Grazing	Unknown	Healthy	5
	Qingshan Fan et al.,2020 animals	2	Rumen	Summer	Maqu Grassland Agricultural Trial Station	3704	Gansu Province	Herbage Bloom stage	Grazing	Unknown	Healthy	5
	Qingshan Fan et al.,2020 animals	2	Rumen	Winter	Maqu Grassland Agricultural Trial Station	3704	Gansu Province	Herbage Senescent stage	Grazing	Unknown	Healthy	5
	Wei Guo et al.,2018 Anaerobe	3	Rumen	Summer	Wushaoling mountain	3562	Gansu Province	Grazing native pastures	Grazing	Unknown	Healthy	Unknown
	Wei Guo et al.,2015 Anaerobe	4	Rumen	Summer	Ganzi Autonomous Prefecture	3500	Sichuan Province	Grazed	Grazing	Male	Healthy	Unknown
	Rui Hu et al.,2019 Front Microbiol	5	Rumen	Autumn	Animal Husbandry and Veterinary Institute of Haibei Prefecture	3350	Qinghai Province	Traditionally graze yaks on native pasture without feed supplements	Grazing	Unknown	Healthy	1.25
	Chang Liu et al.,2019 Front Microbiol	6	Rumen	Unknown	Qinghai-Tibetan Plateau	4500	Qinghai-Tibetan Plateau	Crude fiber content below 18%	Feeding	Male	Healthy	4
	Chang Liu et al.,2019 Front Microbiol	6	Rumen	Unknown	Qinghai-Tibetan Plateau	4500	Qinghai-Tibetan Plateau	Crude fiber content of 25 to 45%	Feeding	Male	Healthy	4
	Li Ma et al.,2019 PeerJ	7	Rumen	Spring	Senduo Township, Guinan County	3265	Qinghai Province	Re-greening grass growth stage	Grazing	Unknown	Healthy	3
	Li Ma et al.,2019 PeerJ	7	Rumen	Summer	Senduo Township, Guinan County	3265	Qinghai Province	Grass growth stage	Grazing	Unknown	Healthy	3
	Li Ma et al.,2019 PeerJ	7	Rumen	Winter	Senduo Township, Guinan County	3265	Qinghai Province	Withered grass growth stage	Grazing	Unknown	Healthy	3
	Qingmiao Ren et al.,2020 MicrobiologyOpen	8	Rumen	Autumn	Hezuo city	3000	Gansu province	Graze	Grazing	Female	Healthy	4
	Jinwei Xin et al.,2019 Front Microbiol	9	Rumen	Autumn	Riwoqe County, Qamdo City	4500	Tibet	Grazing: Temperate meadow	Grazing	Female	Healthy	4.5
	Jinwei Xin et al.,2019 Front Microbiol	9	Rumen	Autumn	Riwoqe County, Qamdo City	4500	Tibet	Grazing: Temperate meadow	Grazing	Female	Healthy	4.5
	Jinwei Xin et al.,2019 Front Microbiol	9	Rumen	Autumn	Shenza County, Nagchu City	4700	Tibet	Grazing: Alpine meadow	Grazing	Female	Healthy	4.5
	Jinwei Xin et al.,2019 Front Microbiol	9	Rumen	Autumn	Shenza County, Nagchu City	4700	Tibet	Grazing: Alpine meadow	Grazing	Female	Healthy	4.5
	Jinwei Xin et al.,2019 Front Microbiol	9	Rumen	Autumn	Zhongba County, Shigatse City	4700	Tibet	Grazing	Grazing	Female	Healthy	4.5
	Jinwei Xin et al.,2019 Front Microbiol	9	Rumen	Autumn	Zhongba County, Shigatse City	4700	Tibet	Grazing	Grazing	Female	Healthy	4.5
	Dan Xue et al.,2016 Livestock Science	10	Rumen	Autumn	Hong yuan County	3600	Sichuan Province	Grazing	Grazing	Unknown	Healthy	5
	Dan Xue et al.,2016 Livestock Science	10	Rumen	Autumn	Hong yuan County	3600	Sichuan Province	Grazing	Grazing	Unknown	Healthy	5
	Dan Xue et al.,2017 Syst Appl Microbiol	11	Rumen	Spring	Guinan County	3400	Qinghai Province	Natural grazing	Grazing	Unknown	Healthy	1
	Dan Xue et al.,2017 Syst Appl Microbiol	11	Rumen	Spring	Guinan County	3400	Qinghai Province	Natural grazing	Grazing	Unknown	Healthy	1
	Dan Xue et al.,2017 Syst Appl Microbiol	11	Rumen	Spring	Guinan County	3129	Qinghai Province	Total mixed ration	Feeding	Unknown	Healthy	1
	X.T.Yan et al.,2018 Anim.Feed Sci.Technol.	12	Rumen	Unknown	Dingxi City	1899	Gansu Province	A basal diet supplemented with a low concentration (10g/kg diet) of slow-release urea	Feeding	Unknown	Healthy	4
	X.T.Yan et al.,2018 Anim.Feed Sci.Technol.	12	Rumen	Unknown	Dingxi City	1899	Gansu Province	A basal diet supplemented with a higher concentration (20g/kg diet) of slow-release urea	Feeding	Unknown	Healthy	4
	Zhenming Zhou et al.,2017 Front Microbiol	13	Rumen	Autumn	Mozhugongka county	4467	Tibet	Graze	Grazing	Male	Healthy	3.75
	Zhenming Zhou et al.,2017 Front Microbiol	13	Rumen	Autumn	Mozhugongka county	4467	Tibet	Grazing and supplementary feeding	Feeding	Male	Healthy	3.75
	Zhenming Zhou et al.,2017 Front Microbiol	13	Rumen	Autumn	Mozhugongka county	4467	Tibet	Feed	Feeding	Male	Healthy	3.75
	Huawei Zou et al.,2019 Animals	14	Rumen	Unknown	Jiulong County	3411	Sichuan province	Normal feeding period	Feeding	Male	Healthy	3
	Huawei Zou et al.,2019 Animals	14	Rumen	Unknown	Jiulong County	3411	Sichuan province	Refeeding period	Feeding	Male	Healthy	3
	Qingshan Fan et al.,2020 BMC Microbiol	15	Rumen	Summer	Sangke Township	2800	Gansu Province	Full-grazing system with herbage as the only feed	Grazing	Unknown	Healthy	Unknown
	Qingshan Fan et al.,2020 BMC Microbiol	15	Rumen	Summer	Manrima village, Maqu County	3700	Gansu Province	Full-grazing system with herbage as the only feed	Grazing	Unknown	Healthy	Unknown
	Qingshan Fan et al.,2020 BMC Microbiol	15	Rumen	Summer	Gulu Township, Naqu Prefecture	4700	Tibet	Full-grazing system with herbage as the only feed	Grazing	Unknown	Healthy	Unknown
	Haiyan Wei et al.,2021 J Sci Food Agric	16	Rumen	Autumn	Haibei Alpine Modern Ecological Husbandry and Technology Demonstrative Garden	3170	Qinghai province	Feed	Feeding	Male	Early weaning	0.5
	Jian Ma et al.,2020 Front Microbiol	17	Rumen	Unknown	Animal Husbandry and Veterinary Institute of Haibei Prefecture	3200	Qinghai province	Pastured on the same plateau grassland without supplementary feed and housing	Grazing	Male	Growth normal	1.3
	Rui Hu et al.,2020 Animals	18	Rumen	Unknown	Animal Husbandry and Veterinary Institute of Haibei Prefecture	3350	Qinghai province	Feed	Feeding	Male	Healthy	3
	Anum Ali Ahmad et al.,2021 PeerJ	19	Rumen	Winter	Hezuo Yak Breeding Cooperatives	2960	Gansu province	Grazing	Grazing	Female	Healthy	3
	Anum Ali Ahmad et al.,2021 PeerJ	19	Rumen	Winter	Hezuo Yak Breeding Cooperatives	2960	Gansu province	Feed	Feeding	Female	Healthy	3
	Z.W. Zhao et al.,2021 Anim. Feed Sci. Technol.	20	Rumen	Summer	Tianmu Animal Husbandry Co., Ltd. of Naqu City	4513	Tibet	Feed	Feeding	Female	Multiparous lactating	Unknown
	Dongwang?Wu et al.,2021 Arch Microbiol	21	Rumen	Summer	Pudatuo National Park, Shangri-La City	3600	Yunnan Province	Grazing	Grazing	Unknown	Healthy	2.3
	Dongwang?Wu et al.,2021 Arch Microbiol	21	Rumen	Summer	Yimen County	1100	Yunnan Province	Grazing	Grazing	Unknown	Healthy	2.3
	Dongwang Wu et al.,2020 Braz J Microbiol	22	Rumen	Unknown	Shangri-La city	3600	Yunnan Province	Grazing	Grazing	Unknown	Healthy	Unknown
	Qingshan Fan et al.,2020 Asian-Australas J Anim Sci	23	Rumen	Summer	Manrima village, Maqu County	3704	Gansu Province	Grazed	Grazing	Female	Healthy mid-lactation yaks	Unknown
	Chuntao Yang et al.,2020 J. anim. sci. technol.	24	Rumen	Autumn	Maqu Grassland Agriculture Trial Station of Lanzhou University	3500	Gansu Province	Grazed	Grazing	Unknown	Healthy	2
	Wei Guo et al.,2020 Anim. Microbiome	25	Rumen	Unknown	Wushaoling of Tianzhu Autonomous County	3154	Gansu Province	Grazed	Grazing	Unknown	Healthy	0.019
	Wei Guo et al.,2020 Anim. Microbiome	25	Rumen	Unknown	Wushaoling of Tianzhu Autonomous County	3154	Gansu Province	Grazed	Grazing	Unknown	Healthy	0.038
	Wei Guo et al.,2020 Anim. Microbiome	25	Rumen	Unknown	Wushaoling of Tianzhu Autonomous County	3154	Gansu Province	Grazed	Grazing	Unknown	Healthy	0.08
	Wei Guo et al.,2020 Anim. Microbiome	25	Rumen	Unknown	Wushaoling of Tianzhu Autonomous County	3154	Gansu Province	Grazed	Grazing	Unknown	Healthy	0.17
	Wei Guo et al.,2020 Anim. Microbiome	25	Rumen	Unknown	Wushaoling of Tianzhu Autonomous County	3154	Gansu Province	Grazed	Grazing	Unknown	Healthy	0.25
	Wei Guo et al.,2020 Anim. Microbiome	25	Rumen	Unknown	Wushaoling of Tianzhu Autonomous County	3154	Gansu Province	Grazed	Grazing	Unknown	Healthy	0.33
	Wei Guo et al.,2020 Anim. Microbiome	25	Rumen	Unknown	Wushaoling of Tianzhu Autonomous County	3154	Gansu Province	Grazed	Grazing	Unknown	Healthy	0.5
	Wei Guo et al.,2020 Anim. Microbiome	25	Rumen	Unknown	Wushaoling of Tianzhu Autonomous County	3154	Gansu Province	Grazed	Grazing	Unknown	Healthy	1
	Wei Guo et al.,2020 Anim. Microbiome	25	Rumen	Unknown	Wushaoling of Tianzhu Autonomous County	3154	Gansu Province	Grazed	Grazing	Unknown	Healthy	2
	Wei Guo et al.,2020 Anim. Microbiome	25	Rumen	Unknown	Wushaoling of Tianzhu Autonomous County	3154	Gansu Province	Grazed	Grazing	Unknown	Healthy	3
	Wei Guo et al.,2020 Anim. Microbiome	25	Rumen	Unknown	Wushaoling of Tianzhu Autonomous County	3154	Gansu Province	Grazed	Grazing	Unknown	Healthy	5
	Wei Guo et al.,2020 Anim. Microbiome	25	Rumen	Unknown	Wushaoling of Tianzhu Autonomous County	3154	Gansu Province	Grazed	Grazing	Unknown	Healthy	8
	Wei Guo et al.,2020 Anim. Microbiome	25	Rumen	Unknown	Wushaoling of Tianzhu Autonomous County	3154	Gansu Province	Grazed	Grazing	Unknown	Healthy	10
	Wei Guo et al.,2020 Anim. Microbiome	25	Rumen	Unknown	Wushaoling of Tianzhu Autonomous County	3154	Gansu Province	Grazed	Grazing	Unknown	Healthy	12
	Lihong Zhang et al.,2020 Anaerobe	26	Jejunum	Unknown	Qinghai Province, China	3000	Qinghai Province	Free-range and grazed	Grazing	Female	Healthy	2
	Jian Ma et al.,2020 Front Microbiol	17	Jejunum	Unknown	Animal Husbandry and Veterinary Institute of Haibei Prefecture	3200	Qinghai province	Pastured on the same plateau grassland without supplementary feed and housing	Grazing	Male	Growth normal	1.3
	Lihong Zhang et al.,2020 Anaerobe	26	Ileum	Unknown	Qinghai Province, China	3000	Qinghai Province	Free-range and grazed	Grazing	Female	Healthy	2
	Jian Ma et al.,2020 Front Microbiol	17	Ileum	Unknown	Animal Husbandry and Veterinary Institute of Haibei Prefecture,	3200	Qinghai province	Pastured on the same plateau grassland without supplementary feed and housing	Grazing	Male	Growth normal	1.3
	Yuanyang Nie et al.,2017 Asian-australas j anim sci	27	Colon	Unknown	Hongyuan County in Aba an and Qiang Autonomous Prefecture,	3507	Sichuan province	Were managed in a large lot owned by Sichuan Grassland Science Academy.	Grazing	Male	Healthy	0.5
	Yuanyang Nie et al.,2017 Asian-australas j anim sci	27	Colon	Unknown	Hongyuan County in Aba an and Qiang Autonomous Prefecture,	3507	Sichuan province	Were managed in a large lot owned by Sichuan Grassland Science Academy.	Grazing	Male	Healthy	1.5
	Yuanyang Nie et al.,2017 Asian-australas j anim sci	27	Colon	Unknown	Hongyuan County in Aba an and Qiang Autonomous Prefecture,	3507	Sichuan province	Were managed in a large lot owned by Sichuan Grassland Science Academy.	Grazing	Male	Healthy	2.5
	Jian Ma et al.,2020 Front Microbiol	17	Colon	Unknown	Animal Husbandry and Veterinary Institute of Haibei Prefecture,	3200	Qinghai province	Pastured on the same plateau grassland without supplementary feed and housing	Grazing	Male	Growth normal	1.3
	Lihong Zhang et al.,2020 Anaerobe	26	Cecum	Unknown	Qinghai Province, China	3000	Qinghai Province	Free-range and grazed	Grazing	Female	Healthy	2
	Jian Ma et al.,2020 Front Microbiol	17	Cecum	Unknown	Animal Husbandry and Veterinary Institute of Haibei Prefecture,	3200	Qinghai province	Pastured on the same plateau grassland without supplementary feed and housing	Grazing	Male	Growth normal	1.3
	Jinwei Xin et al.,2019 Front Microbiol	9	Reticulum	Autumn	Riwoqe County, Qamdo City	4500	Tibet	Grazing: Temperate meadow	Grazing	Female	Healthy	4.5
	Jinwei Xin et al.,2019 Front Microbiol	9	Reticulum	Autumn	Shenza County, Nagchu City	4700	Tibet	Grazing: Alpine meadow	Grazing	Female	Healthy	4.5
	Jinwei Xin et al.,2019 Front Microbiol	9	Reticulum	Autumn	Zhongba County, Shigatse City	4700	Tibet	Grazing	Grazing	Female	Healthy	4.5
	Jinwei Xin et al.,2019 Front Microbiol	9	Omasum	Autumn	Riwoqe County, Qamdo City	4500	Tibet	Grazing: Temperate meadow	Grazing	Female	Healthy	4.5
	Jinwei Xin et al.,2019 Front Microbiol	9	Omasum	Autumn	Shenza County, Nagchu City	4700	Tibet	Grazing: Alpine meadow	Grazing	Female	Healthy	4.5
	Jinwei Xin et al.,2019 Front Microbiol	9	Omasum	Autumn	Zhongba County, Shigatse City	4700	Tibet	Grazing	Grazing	Female	Healthy	4.5
	Jinwei Xin et al.,2019 Front Microbiol	9	Abomasum	Autumn	Riwoqe County, Qamdo City	4500	Tibet	Grazing: Temperate meadow	Grazing	Female	Healthy	4.5
	Jinwei Xin et al.,2019 Front Microbiol	9	Abomasum	Autumn	Shenza County, Nagchu City	4700	Tibet	Grazing: Alpine meadow	Grazing	Female	Healthy	4.5
	Jinwei Xin et al.,2019 Front Microbiol	9	Abomasum	Autumn	Zhongba County, Shigatse City	4700	Tibet	Grazing	Grazing	Female	Healthy	4.5
	Lihong Zhang et al.,2020 Anaerobe	26	Duodenum	Unknown	Qinghai Province, China	3000	Qinghai Province	Free-range and grazed	Grazing	Female	Healthy	2
	Jian Ma et al.,2020 Front Microbiol	17	Duodenum	Unknown	Animal Husbandry and Veterinary Institute of Haibei Prefecture	3200	Qinghai province	Pastured on the same plateau grassland without supplementary feed and housing	Grazing	Male	Growth normal	1.3
	Zhaoqing Han et al.,2017 Microb Pathog	28	Fecal	Unknown	Livestock breeding station in Hongyuan	3507	Sichuan province	Unknown	Unknown	Male	Healthy	0.08219
	Wenwen Liu et al.,2021 Front Microbiol	29	Fecal	Summer	Lhasa city	3650	Tibet	Exclusively grazed on natural pastures in the summer	Grazing	Male	Healthy	Unknown
	Wenwen Liu et al.,2021 Front Microbiol	29	Fecal	Summer	Yushu city	4200	Qinghai Province	Exclusively grazed on natural pastures in the summer	Grazing	Male	Healthy	Unknown
	Wenwen Liu et al.,2021 Front Microbiol	29	Fecal	Summer	Shangri-la city	3459	Yunnan Province	Exclusively grazed on natural pastures in the summer	Grazing	Male	Healthy	Unknown
	Haibo Fu et al.,2021 Front Microbiol	30	Fecal	Autumn	Datong Yak Breeding Farm	2980	Qinghai Province	Feed	Feeding	Unknown	Healthy	Unknown
	Xiao-Ling Zhang et al.,2020 Animals	31	Fecal	Winter	Haibei Demonstration Zone of Plateau Modern Ecological Animal Husbandry Science and Technology	3100	Qinghai province	Grazing	Grazing	Female	Healthy	2
	Xiao-Ling Zhang et al.,2020 Animals	31	Fecal	Winter	Haibei Demonstration Zone of Plateau Modern Ecological Animal Husbandry Science and Technology	3100	Qinghai province	Feed	Feeding	Female	Healthy	2
	Haibo Fu et al.,2020 Microb Biotechnol	32	Fecal	Summer	Reshui village, Gangcha County	3650	Qinghai province	Unknown	Unknown	Unknown	Healthy	Unknown
	Haibo Fu et al.,2020 Microb Biotechnol	32	Fecal	Winter	Reshui village, Gangcha County	3650	Qinghai province	Unknown	Unknown	Unknown	Healthy	Unknown
	Ga Gong et al.,2020 BMC Microbiol	33	Fecal	Summer	Xizang	4715	Tibet	Unknown	Unknown	Female	Healthy	Unknown
	Ga Gong et al.,2020 BMC Microbiol	33	Fecal	Summer	Xizang	3250	Tibet	Unknown	Unknown	Female	Healthy	Unknown
	Na Guo et al.,2021 npj Biofilms and Microbiomes	34	Fecal	Spring	Tianzhu county	3155	Gansu Province	Grazed freely	Grazing	Unknown	Healthy	Unknown
	Na Guo et al.,2021 npj Biofilms and Microbiomes	34	Fecal	Summer	Tianzhu county	3155	Gansu Province	Grazed freely	Grazing	Unknown	Healthy	Unknown
	Na Guo et al.,2021 npj Biofilms and Microbiomes	34	Fecal	Autumn	Tianzhu county	3155	Gansu Province	Grazed freely	Grazing	Unknown	Healthy	Unknown
	Na Guo et al.,2021 npj Biofilms and Microbiomes	34	Fecal	Winter	Tianzhu county	3155	Gansu Province	Grazed freely	Grazing	Unknown	Healthy	Unknown
	Na Guo et al.,2021 npj Biofilms and Microbiomes	34	Fecal	Spring	Tianzhu county	2965	Gansu Province	Grazed	Grazing	Unknown	Healthy	Unknown
	Na Guo et al.,2021 npj Biofilms and Microbiomes	34	Fecal	Summer	Tianzhu county	3315	Gansu Province	Grazed	Grazing	Unknown	Healthy	Unknown
	Na Guo et al.,2021 npj Biofilms and Microbiomes	34	Fecal	Autumn	Tianzhu county	3057.5	Gansu Province	Grazed	Grazing	Unknown	Healthy	Unknown
	Na Guo et al.,2021 npj Biofilms and Microbiomes	34	Fecal	Winter	Tianzhu county	2965	Gansu Province	Grazed	Grazing	Unknown	Healthy	Unknown
	Note: Batch number was defined as the number of studies included. Province was determined by mapping the sampling location. Feeding pattern was catagorized into two types: feeding (if yaks were completely or partically maintained as indoor feeding) and grazing (if yaks were completely grazed). In Addition, one study claimed the inclusion of wild yaks in comparison with their half-blood counterpar…
